# Supplementary material
Source: PubMed Central journal article supplement (PMC365729)

**A**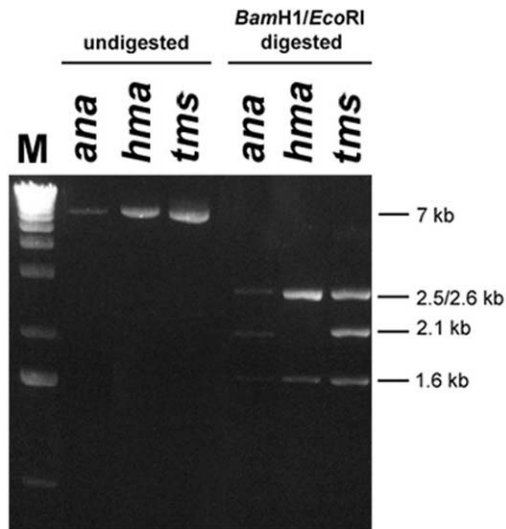**B**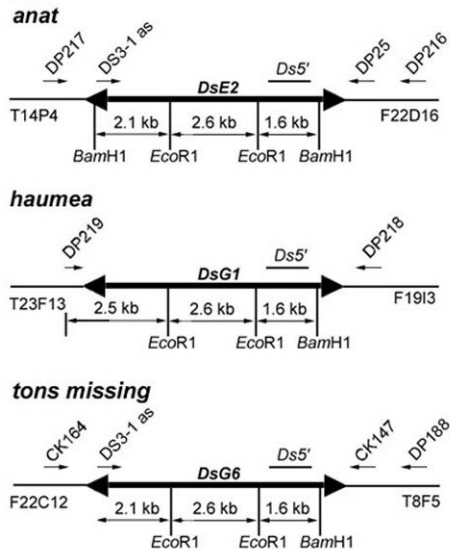

Supplement: pnas_101_9_2969__5.pdf [file pnas_101_9_2969__5.pdf]

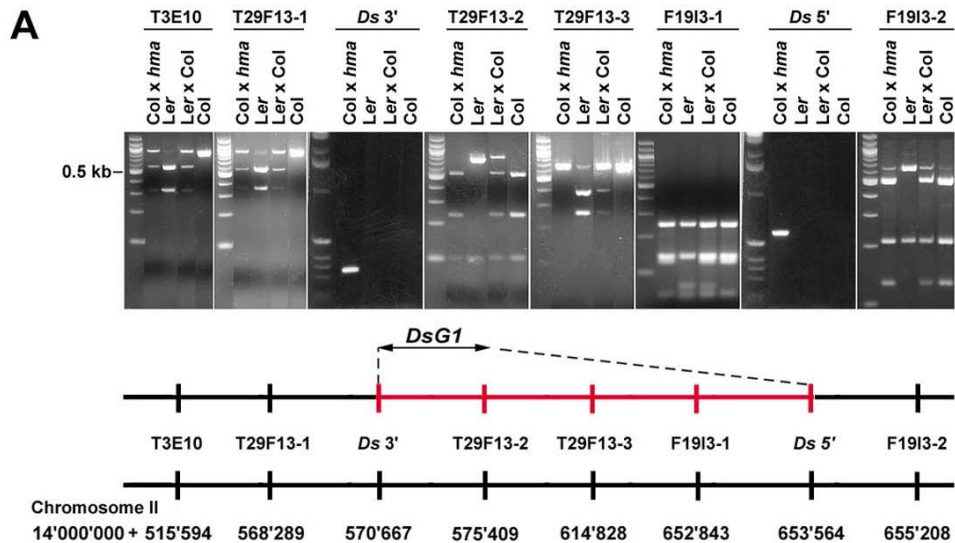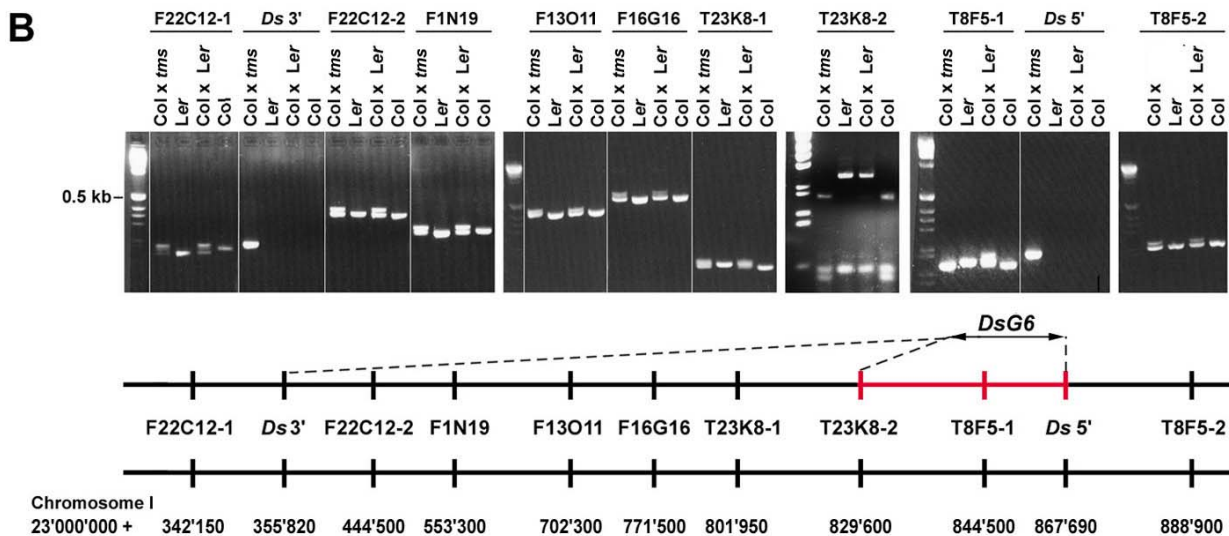

Supplement: pnas_101_9_2969__7.pdf [file pnas_101_9_2969__7.pdf]
